# Supplementary material
Source: publisher figshare collection journal article supplement (https://brill.figshare.com/ndownloader/files/39716227)
Supplement: Supplementary file 1 [file 39716227]

## Sheet: Sheet1
Table S1. Specimens of Nesobasis and Vanuatubasis and outgroups examined in this study. For each individual we list the geographical locality of collection, voucher deposition, sex, and accession number for gene sequences.
Genus	Species	Specimen ID	Voucher desposition	Locality	Sex	ITS	LCO	CO1	12s	PRMT	Reference
Ischnura	heterosticta	JSS16844	CNC	Stanthorpe, Queensland Australia	?	–	FJ812773	FJ812817	FJ812728	–	Beatty et al. 2017
Ischnura	ramburii	BEA426	not available (see citation)	not available (see citation)	?	–	–	MT680705	–	MT665885	Blow et al. 2021
Coenagrion	terue	RF2252	not available (see citation)	not available (see citation)	M	LC087125	–	LC087129	–	–	Futahashi & Goto, 2015
Megalagrion	heterogamias	OD1739	BYU	Kauai, Hawaii USA	M?	Available upon request	Available upon request	Available upon request	Available upon request	Available upon request	This study
Nesobasis	angulicollis	JSS17224	CNC	Small stream on road to Abaca, Viti Levu Fiji	M	–	FJ812785	FJ812829	FJ812740	–	Beatty et al. 2017
Nesobasis	angulicollis1	JSS17208	CNC	Sabeto River, Viti Levu Fiji	M	FJ812871	FJ812784	FJ812828	FJ812739	–	Beatty et al. 2017
Nesobasis	angulicollis2	NE915	not available (see citation)	Abaca Road 3, Viti Levu Fiji	M	–	MH348628	–	–	MH328052	Lorenzo-Carballa et al. 2019
Nesobasis	angulicollis3	NE921	not available (see citation)	Abaca Road 3, Viti Levu Fiji	M	–	MH348629	–	–	MH328053	Lorenzo-Carballa et al. 2019
Nesobasis	brachycera	JSS17215	CNC	Niuwauvudi Creek, Vanua Levu Fiji	M	FJ812872	FJ812787	FJ812831	FJ812742	–	Beatty et al. 2017
Nesobasis	caerulecaudata	JSS17209	CNC	Stream crossing Vaturu Dam Road, Viti Levu Fiji	M	FJ812875	FJ812790	FJ812834	FJ812745	–	Beatty et al. 2017
Nesobasis	campioni	JSS17223	CNC	Waterfall above Wainikovu Trib., Viti Levu Fiji	F	FJ812876	FJ812791	FJ812835	FJ812746	–	Beatty et al. 2017
Nesobasis	comosa	NE0928	not available (see citation)	Abaca Road 3, Viti Levu Fiji	M	–	MH348647	–	–	MH328069	Lorenzo-Carballa et al. 2019
Nesobasis	comosa1	JSS17204	CNC	Wainikovu Creek, Viti Levu Fiji	M	–	FJ812792	FJ812836	FJ812747	–	Beatty et al. 2017
Nesobasis	comosa2	JSS17210	CNC	Stream crossing Vaturu Dam Road, Viti Levu Fiji	M	FJ812877	FJ812793	FJ812837	FJ812748	–	Beatty et al. 2017
Nesobasis	erythrops	JSS17205	CNC	Korowaiwai Creek, Viti Levu Fiji	M	FJ812879	FJ812795	FJ812839	FJ812750	–	Beatty et al. 2017
Nesobasis	erythrops1	NE0043	not available (see citation)	Wainikovu, Viti Levu Fiji	F	–	MH348658	–	–	MH328080	Lorenzo-Carballa et al. 2019
Nesobasis	flavifrons	JSS17211	CNC	Stream crossing Vaturu Dam Road, Viti Levu Fiji	M	FJ812880	FJ812796	FJ812840	FJ812751	–	Beatty et al. 2017
Nesobasis	heteroneura	JSS17319	CNC	Waikubukubu River, Viti Levu Fiji	F	FJ812882	–	FJ812842	FJ812753	–	Beatty et al. 2017
Nesobasis	leveri	JSS17155	CNC	Logging road to Waivudawa, Viti Levu Fiji	M	FJ812883	FJ812798	FJ812843	FJ812754	–	Beatty et al. 2017
Nesobasis	longistyla	JSS17207	CNC	Stream crossing Vaturu Dam Road, Viti Levu Fiji	M	FJ812884	FJ812799	FJ812844	FJ812755	–	Beatty et al. 2017
Nesobasis	malcolmi	JSS17213	CNC	Abaca Village, Viti Levu Fiji	F	FJ812886	FJ812801	FJ812846	FJ812757	–	Beatty et al. 2017
Nesobasis	monticola	NE1624	not available (see citation)	Vereni Falls, Viti Levu Fiji	F	–	MH348732	–	–	MH328145	Lorenzo-Carballa et al. 2019
Nesobasis	recava	JSS16977	CNC	Moanakaka Bird Sanctuary, Kadavu Fiji	M	FJ812890	FJ812806	–	FJ812762	–	Beatty et al. 2017
Nesobasis	rufostimga	NE0015	not available (see citation)	Vaqo Creek, Viti Levu Fiji	F	–	MH348735	–	-	MH328150	Lorenzo-Carballa et al. 2019
Nesobasis	rufostigma1	JSS17152	CNC	Moanakaka Bird Sanctuary, Kadavu Fiji	F	FJ812892	FJ812808	FJ812852	FJ812764	–	Beatty et al. 2017
Nesobasis	rufostigma2	JSS17203	CNC	Vago Creek, Viti Levu Fiji	F	FJ812893	FJ812809	FJ812853	FJ812765	–	Beatty et al. 2017
Nesobasis	rufostigma3	JSS17230	CNC	Buretini Creek, Koro Fiji	F	FJ812894	FJ812810	FJ812854	FJ812766	–	Beatty et al. 2017
Nesobasis	selysi	JSS17202	CNC	Small tributary of Qualiwana Creek, Viti Levu Fiji	M	–	FJ812811	FJ812855	FJ812767	–	Beatty et al. 2017
Nesobasis	selysi2	JSS17183	CNC	Vereni Falls near Lautoka, Viti Levu Fiji	F	–	FJ812802	FJ812847	FJ812758	–	Beatty et al. 2017
Nesobasis	selysi3	JSS17226	CNC	Korowaiwai Creek, Viti Levu Fiji	F	FJ812887	FJ812803	FJ812848	FJ812759	–	Beatty et al. 2017
Nesobasis	sp_nov_3	JSS17219	CNC	Lomaloma Falls, Vanua Levu Fiji	F	–	FJ812786	FJ812830	FJ812741	–	Beatty et al. 2017
Nesobasis	sp_nov_4a	JSS17222	CNC	Sauvuqoro Creek, in Waisali Nature Preserve, Vanua Levu Fiji	M	–	FJ812813	FJ812857	FJ812769	–	Beatty et al. 2017
Nesobasis	sp_nov_4b	NE0452	not available (see citation)	Lomaloma Falls, Vanua Levu Fiji	F	–	MH348764	–	–	MH328181	Lorenzo-Carballa et al. 2019
Nesobasis	sp_nov_5	JSS17227	CNC	Wainivesi Creek, Viti Levu Fiji	F	FJ812885	FJ812800	FJ812845	FJ812756	–	Beatty et al. 2017
Nesobasis	rito	JSS17217	CNC	Lomaloma Falls, Vanua Levu Fiji	M	FJ812888	FJ812804	FJ812849	FJ812760	–	Beatty et al. 2017
Nesobasis	sp_nov_7	CB562	Lost	Volivoli Creek, Vanua Levu Fiji	F	FJ812889	FJ812805	FJ812850	FJ812761	–	Beatty et al. 2017
Nesobasis	sp_nov_8	JSS17225	CNC	Stream on road above Korotesere, Vanua Levu Fiji	M	FJ812898	FJ812816	FJ812860	FJ812772	–	Beatty et al. 2017
Nesobasis	sp_nov_9	JSS17216	CNC	Lomaloma Falls, Vanua Levu Fiji	F	FJ812878	FJ812794	FJ812838	FJ812749	–	Beatty et al. 2017
Nesobasis	sp_nov_10	JSS17241	CNC	Large stream on E side of Koro, Koro Fiji	M	FJ812881	–	FJ812797	FJ812752	–	Beatty et al. 2017
Nesobasis	sp_nov_11	JSS17218	CNC	Small stream above Saivou, Vanua Levu Fiji	M	FJ812870	FJ812783	FJ812827	FJ812738	–	Beatty et al. 2017
Nesobasis	sp_nov_12	CB838	Lost	Sauvuqoro Creek, Vanua Levu Fiji	M	FJ812891	FJ812807	FJ812851	FJ812763	–	Beatty et al. 2017
Nesobasis	sp_nov_13	JSS17162	CNC	Bouma Track Upper Falls, Taveuni Fiji	M	FJ812896	FJ812814	FJ812858	FJ812770	–	Beatty et al. 2017
Nesobasis	sp_nov_14	JSS17220	CNC	Raviravi Creek, Vanua Levi Fiji	M	FJ812897	FJ812815	FJ812859	FJ812771	–	Beatty et al. 2017
Nesobasis	sp_nov_16	JSS17229	CNC	Navaka Creek at Tavoro Falls, Bouma, Taveuni Fiji	?	FJ812873	FJ812788	FJ812832	FJ812743	–	Beatty et al. 2017
Nesobasis	telegastrum	JSS17212	CNC	Small stream on road to Abaca, Viti Levu Fiji	M	FJ812895	FJ812812	FJ812856	FJ812768	–	Beatty et al. 2017
Nesobasis	telegastrum1	NE1663	not available (see citation)	Abaca Road 2, Viti Levu Fiji	M	–	MH348763	–	–	MH328177	Lorenzo-Carballa et al. 2019
Psuedagrion	ignifer	JSS16845	CNC	Brisbane Forest Park, Northbrook Creek, Queensland Australia	M	FJ812861	FJ812774	FJ812818	FJ812729	–	Beatty et al. 2017
Stenagrion	dubium	228951	RMNH	Sarawak, Malaysia	?	FN356168	–	KF369549	–	–	Dijkstra et al. (2013)
Vanuatubasis	bidens	OD1488	BYU	NE of Aneghowhat Village, Aneityum: Anijemhag River Vanuatu	M	Available upon request	Available upon request	Available upon request	Available upon request	Available upon request	This study
Vanuatubasis	malekulana	OD1667	BYU	Venturah, Malekula Vanautu	M?	Available upon request	Available upon request	Available upon request	Available upon request	Available upon request	This study
Vanuatubasis	santoensis	OD1725	BYU	Ipayato, Santo Vanuatu	M?	Available upon request	Available upon request	Available upon request	Available upon request	Available upon request	This study
Vanuatubasis	sp_nov_Efate	OD1693	BYU	Ulei, Efate Vanuatu	M?	Available upon request	Available upon request	Available upon request	Available upon request	Available upon request	This study
CNC – Canadian National Collection of Insects, Arachnicds and Nematodes
BYU – Monte L. Bean Museum Brigham Young University
RMNH – Naturalis Biodiversity Center
